# Supplementary material for: The mechanical response of talin
Source: PubMed Central journal article supplement (PMC4941051; doi:10.1038/ncomms11966), 2016-07-07
Supplement: ncomms11966-s1.pdf [file ncomms11966-s1.pdf]

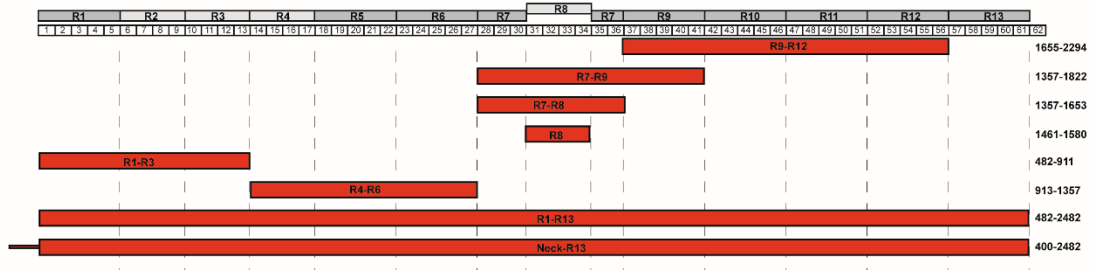

**Supplementary Figure 1. Stretchable talin fragments**

Schematic showing the stretchable talin rod constructs used. The mouse talin1 domain boundaries are shown.

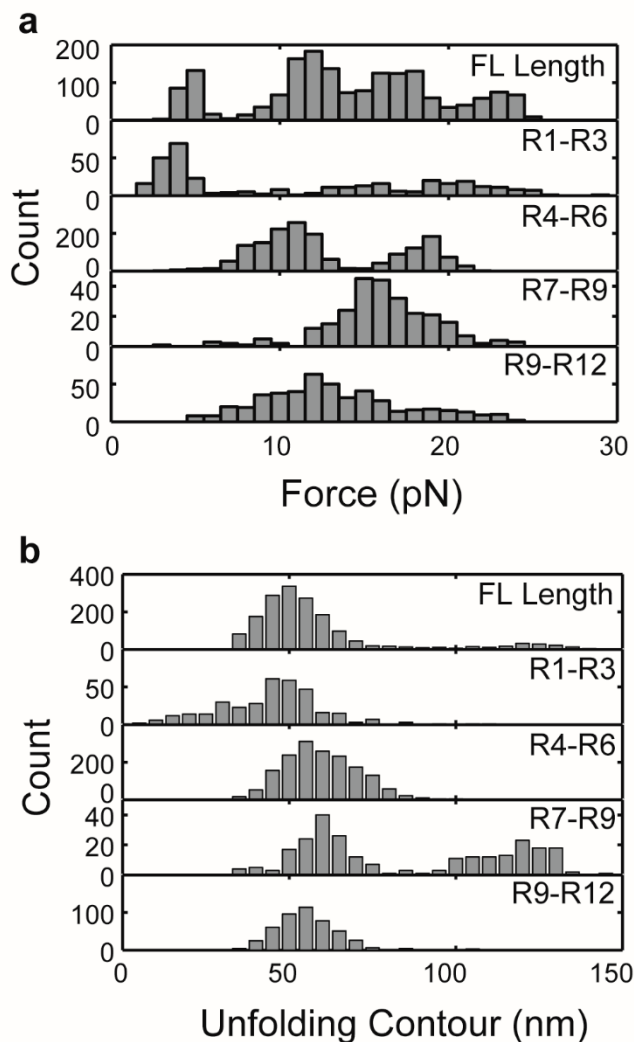

**Supplementary Figure 2. Statistics of talin unfolding.** (a) unfolding force and (b) contour length histogram of the talin rod domain constructs stretched in the study with 3.4-3.8 pN/s loading rates.

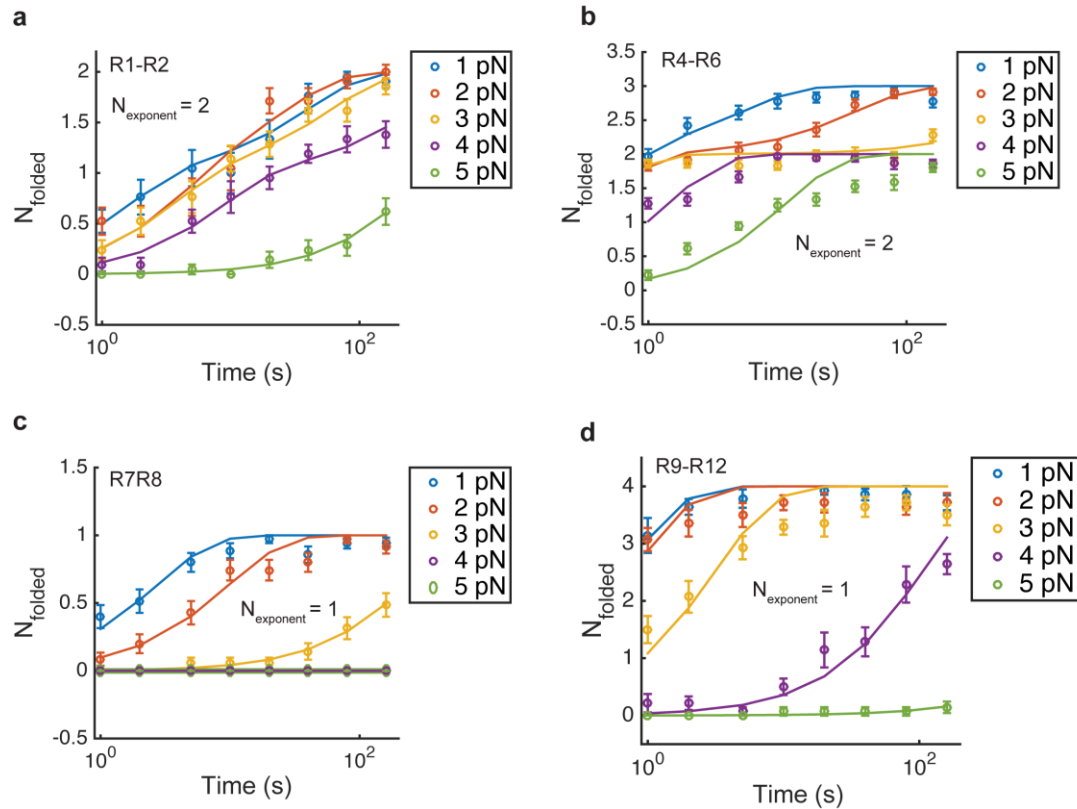

**Supplementary Figure 3. The refolding kinetics of talin rod domains.** The mean number of unfolding events vs. function of folding time for (a) R1-R2, (b) R4-R6, (c) R7-R8) and (d) R9-R12 constructs held at different forces. The solid lines denote exponential fitting for each force by exponential functions. The error bar denotes standard error of the mean. For R1-R2 and R4-R6 constructs, two exponents were required to fit the data.

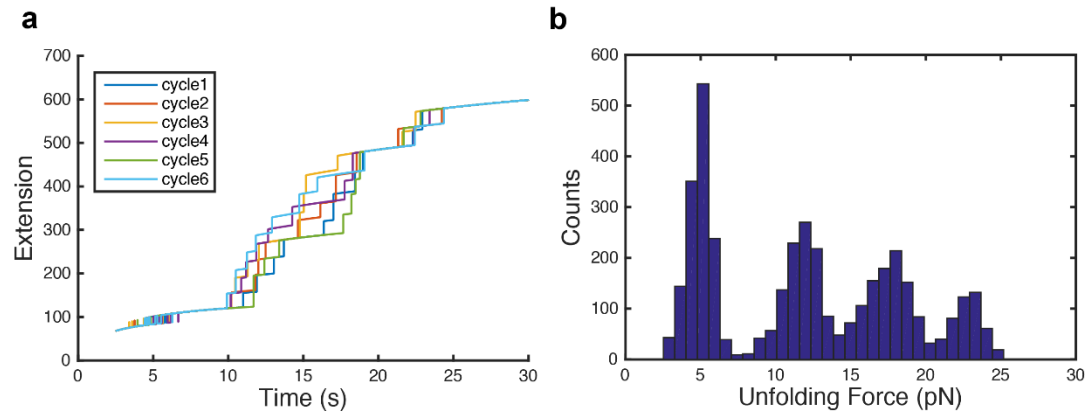

**Supplementary Figure 4. Simulated FL-talin unfolding by experimental determined kinetic rates.** (a) Simulated force-extension curves of FL talin stretched by an increasing force from 0.1 to 30 pN with a 4 pN/s constant loading rates. (b) The corresponding unfolding force histogram of FL-talin in (a), collected from 250 simulated traces.

| Tailin rod domain      | 1                    | 2                    | 3     | 4                    | 5                    | 6                    | 7 - 8                | 9                    | 10                   | 11                   | 12                   |
|------------------------|----------------------|----------------------|-------|----------------------|----------------------|----------------------|----------------------|----------------------|----------------------|----------------------|----------------------|
| Domain size (nm)       | 69.2                 | 52.4                 | 49.6  | 52.4                 | 64                   | 60.4                 | 118.4                | 66.8                 | 63.2                 | 66.4                 | 62.8                 |
| $k_{u,0}$ ( $s^{-1}$ ) | $4.2 \times 10^{-6}$ | $1.7 \times 10^{-8}$ | 0.018 | $4.2 \times 10^{-6}$ | $2.5 \times 10^{-5}$ | $2.5 \times 10^{-5}$ | $4.2 \times 10^{-6}$ | $4.2 \times 10^{-6}$ | $2.5 \times 10^{-5}$ | $2.5 \times 10^{-5}$ | $1.7 \times 10^{-8}$ |
| $\Delta X_u$ (nm)      | 3.1                  | 3.4                  | 5.7   | 3.1                  | 4.1                  | 4.1                  | 3.1                  | 3.1                  | 4.1                  | 4.1                  | 3.4                  |
| $k_{f,0}$ ( $s^{-1}$ ) | 0.11                 | 0.019                | 2.22  | 0.46                 | 1.0                  | 1.0                  | 0.39                 | 0.93                 | 0.93                 | 0.93                 | 0.93                 |
| $\Delta X_f$ (nm)      | 18.2                 | 12.5                 | 15.5  | 4.4                  | 15.7                 | 15.7                 | 13.3                 | 14.5                 | 14.5                 | 14.5                 | 14.5                 |

**Supplementary Table 1. Kinetic rates of individual domains used in simulation.**

Continuous grey areas denote the sequence of domains in the area that were not unambiguously assigned.
